# Supplementary material for: Construction of nanoparticle superstructures on the basis of host–guest interaction to achieve performance integration and modulation
Source: Royal Society of Chemistry journal article supplement (doi:10.1039/c2cp40377c), 2012-01-01

## Supporting Information:

### Construction of Nanoparticle Superstructures on the Basis of Host-Guest Interaction to Achieve Performance Integration and Modulation

Zhaolai Chen,<sup>a</sup> Jing Li,<sup>a</sup> Xue Zhang,<sup>a</sup> Zhennan Wu,<sup>a</sup> Hao Zhang,<sup>\*a</sup> Haizhu Sun<sup>\*b</sup> and Bai Yang<sup>a</sup>

<sup>a</sup> State Key Laboratory of Supramolecular Structure and Materials, College of Chemistry, Jilin University, Changchun 130012, P. R. China.

<sup>b</sup> College of Chemistry, Northeast Normal University, Changchun 130024, P. R. China.

E-mail: hao\_zhang@jlu.edu.cn; sunhz335@nenu.edu.cn

**Figure S1.** DLS size distribution of Au/Fe<sub>3</sub>O<sub>4</sub> superstructures. The corresponding TEM image is shown in Figure 2b.

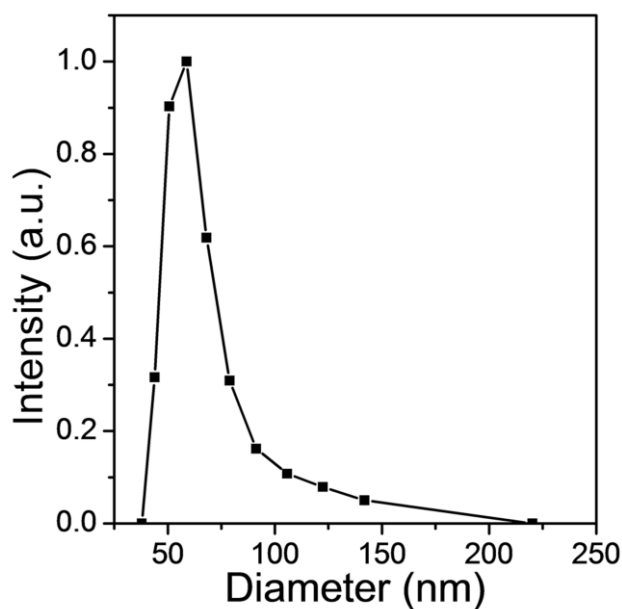

**Figure S2.** An enlarged SAED pattern of Au/Fe<sub>3</sub>O<sub>4</sub> superstructures in Figure 2b with marked crystallographic facets. From inside to outside, the lattice parameters calculated from the diffuse rings are 0.2962, 0.2506, 0.2096, 0.1622, and 0.148 nm, which correspond to the Fe<sub>3</sub>O<sub>4</sub>(220), Au(111), Au(200)/Fe<sub>3</sub>O<sub>4</sub>(400), Fe<sub>3</sub>O<sub>4</sub>(511), and Au(220)/Fe<sub>3</sub>O<sub>4</sub>(440) facets.

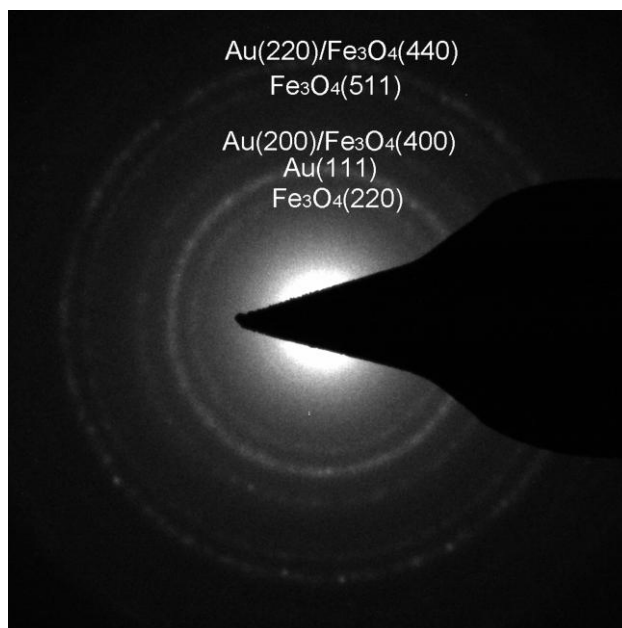

**Figure S3.** TEM image of 6.1 nm Au NPs.

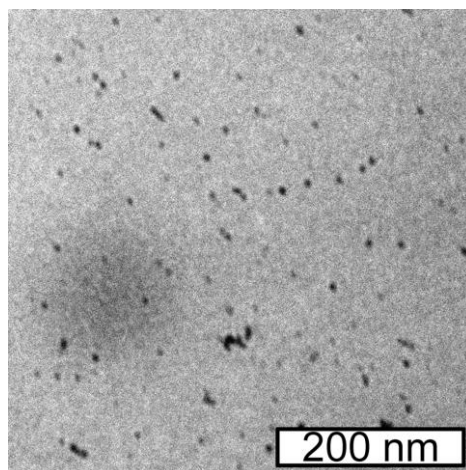

**Figure S4** TEM image of Au/Fe<sub>3</sub>O<sub>4</sub> superstructures after storing for one month.

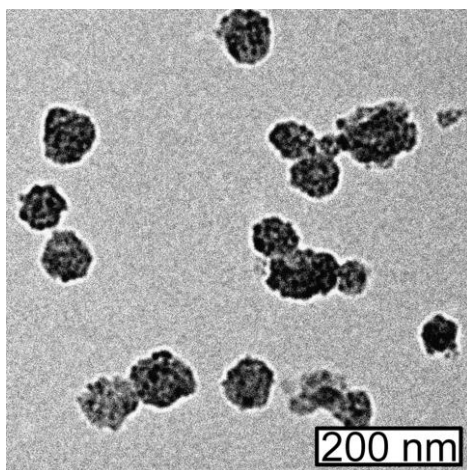

**Figure S5.** TEM images of (a) 2.8 nm Pt and (b) 38 nm NaYF<sub>4</sub>:Yb,Tm NPs.

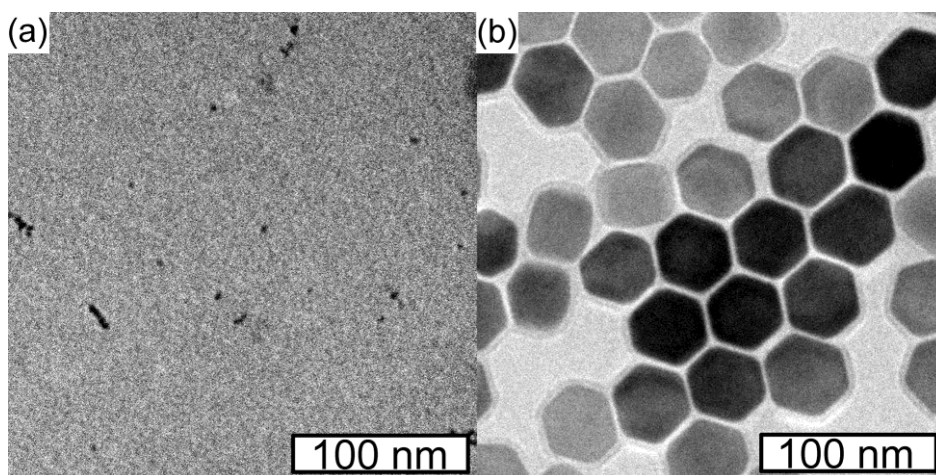

Supplement: c2cp40377c.pdf [file c2cp40377c.pdf]
